# Prostacyclin Promotes Degenerative Pathology in a Model of Alzheimer's disease

Tasha R. Womack<sup>a</sup>, Craig Vollert<sup>a</sup>, Odochi Nwoko<sup>a</sup>, Monika Schmitt<sup>a</sup>, Sagi Montazari<sup>a</sup>, Tina Beckett<sup>b</sup>, David Mayerich<sup>c</sup>, Michael Paul Murphy<sup>b</sup>, Jason L. Eriksen<sup>a,1</sup>

<sup>a</sup> Department of Pharmacological and Pharmaceutical Sciences, University of Houston, Houston, TX

<sup>b</sup> Department of Molecular and Cellular Biochemistry, University of Kentucky, Lexington, KY

<sup>c</sup> Department of Electrical and Computer Engineering, University of Houston, Houston, TX

<sup>1</sup> Correspondence: jeriksen@cougarnet.uh.edu; 5021 HB2, 4849 Calhoun Road, Houston, TX 77204; 1 (713) 743-1226

## **Abstract**

Alzheimer's disease (AD) is a progressive neurodegenerative disorder that is the most common cause of dementia in aged populations. A substantial amount of data demonstrates that chronic neuroinflammation can accelerate neurodegenerative pathologies, while epidemiological and experimental evidence suggests that the use of anti-inflammatory agents may be neuroprotective. In AD, chronic neuroinflammation results in the upregulation of cyclooxygenase and increased production of prostaglandin H<sub>2</sub>, a precursor for many vasoactive prostanoids. While it is well-established that many prostaglandins can modulate the progression of neurodegenerative disorders, the role of prostacyclin (PGI<sub>2</sub>) in the brain is poorly understood. We have conducted studies to assess the effect of elevated prostacyclin biosynthesis in a mouse model of AD. Upregulated prostacyclin expression significantly worsened multiple measures associated with amyloid disease pathologies. Mice overexpressing both amyloid and PGI<sub>2</sub> exhibited impaired learning and memory and increased anxiety-like behavior compared with non-transgenic and PGI<sub>2</sub> control mice. PGI<sub>2</sub> overexpression accelerated the development of amyloid accumulation in the brain and selectively increased the production of soluble amyloid-β 42. PGI<sub>2</sub> damaged the microvasculature through alterations in vascular length and branching; amyloid expression exacerbated these effects. Our findings demonstrate that chronic prostacyclin expression plays a novel and unexpected role that hastens the development of the AD phenotype.

Keywords: Alzheimer's disease; Prostanoid; Neuroinflammation

## **Introduction**

Alzheimer's disease is an incurable neurodegenerative disorder that is the most common cause of dementia. The late-onset form of AD is a slowly developing, progressive disorder, with age as the most significant single risk factor. Major pathological hallmarks of the disease include the accumulation of extracellular amyloid protein and intracellular tau protein,

accompanied by prominent, widespread neuroinflammation (1-4). With disease progression, numerous neuroinflammatory molecules, including prostaglandins and cytokines, become dramatically upregulated within cerebrospinal fluid and throughout the brain parenchyma, and are associated with cognitive impairment (5-8). These findings suggest that persistent inflammation may be a driver of neurodegenerative disease (9-11). Furthermore,

numerous epidemiological studies have suggested that nonsteroidal anti-inflammatory drugs (NSAIDs) may be potentially neuroprotective (12-14); some clinical trials have also reported protective effects of NSAIDs in AD (15-18). In animal models of neurodegenerative disease, numerous experimental studies have demonstrated that NSAIDs have a protective role.

NSAIDs exert their activities through the inhibition of cyclooxygenase (COX) enzymes, which are the mediators of prostanoid biosynthesis. Prostanoids represent a broad class of arachidonic-acid derived molecules, including thromboxane, prostaglandins, and prostacyclin, that can exhibit paracrine signaling activity. Typically, these prostanoids fill a variety of diverse physiological processes that are important for tissue homeostasis (19-21). Inflammatory events and neurotoxic insults can significantly upregulate prostanoid expression, a process that significantly contributes to the AD-associated neuroinflammatory response (22-25). In Alzheimer's disease, one of the crucial triggers associated with prostanoid up-regulation is the accumulation of amyloid-beta protein, which both stimulates pro-inflammatory cytokine production and increases cellular phospholipase activity, the first step in prostanoid biosynthesis (26-28).

The liberation of fatty acid substrates, such as arachidonic acid, is the initiating step of the prostanoid signaling cascade. Free arachidonic acid undergoes conversion, in a two-step reaction, to PGH<sub>2</sub> by COX enzymes. Two major COX enzymes exist, COX-1 and COX-2, which have distinct but overlapping tissue profiles and activities. COX-1 is expressed in the periphery and is a consistently active enzyme that is important for the maintenance of tissue homeostasis. In contrast, COX-2 represents an inducible form of the enzyme. In the brain, COX-2 expression usually is low but becomes dramatically upregulated in Alzheimer's disease (29, 30). The reported neuroprotective properties of NSAIDs are associated COX-2 (31, 32), and numerous studies support the role of COX-2 upregulation in the pathogenesis of AD. Numerous prostaglandins such as prostaglandin E<sub>2</sub> (PGE<sub>2</sub>), prostaglandin D<sub>2</sub> (PGD<sub>2</sub>), prostacyclin (PGI<sub>2</sub>), prostaglandin F<sub>2α</sub> (PGF<sub>2α</sub>), and thromboxane A<sub>2</sub> (TXA<sub>2</sub>) become upregulated with COX-2 expression;

several of these prostanoids, such as PGE<sub>2</sub> and PGD<sub>2</sub>, can stimulate amyloid-beta production and can play roles in other amyloid associated pathologies (33-36). However, the impact of increased PGI<sub>2</sub> in AD is not well understood.

Prostacyclin is synthesized from arachidonic acid

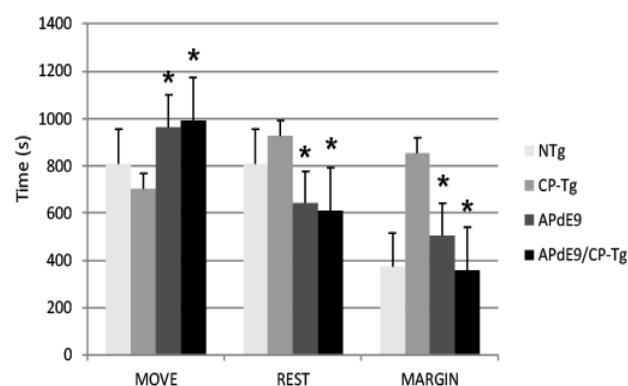

**Figure 1. Effects of prostacyclin overexpression in the open-field test in APdE9 and control mice.** Increases in ambulation and reduced resting times indicate a reduction in anxiety-like behavior (anxiolytic effect), with the opposite results indicating an increase in anxiety-like behavior (anxiogenic effect). Bars are means  $\pm$  SEM,  $n = 7-8$  mice per group. \* $p < 0.05$  compared to CP-Tg control mice.

through a two-step reaction of the COX and PGI<sub>2</sub> synthase (PGIS) enzymes. PGI<sub>2</sub> acts via the G-protein coupled IP receptor to activate adenylyl cyclase and PKA, thereby increasing intracellular cAMP to produce vasodilatory and anti-inflammatory effects (37). While prostacyclin signaling is largely associated with peripheral vasoregulatory activity, multiple cell types in the brain express both PGIS and the IP receptor, including neurons, glia, endothelial cells, and smooth muscle cells (38, 39, 40). These findings suggesting that prostacyclin may act as a modulator of CNS activity.

Experimental applications of stable analogs of PGI<sub>2</sub> within the brain have shown improvements in vascular functions and recovery from neuronal damage. For example, the application of iloprost, a stable analog of PGI<sub>2</sub>, was able to significantly reduce infarct size after 6 hours of middle cerebral artery occlusion in rabbits (41). While the infusion of TEI-7165, another analog of PGI<sub>2</sub>, was able to rescue hippocampal neurons and improve response latencies

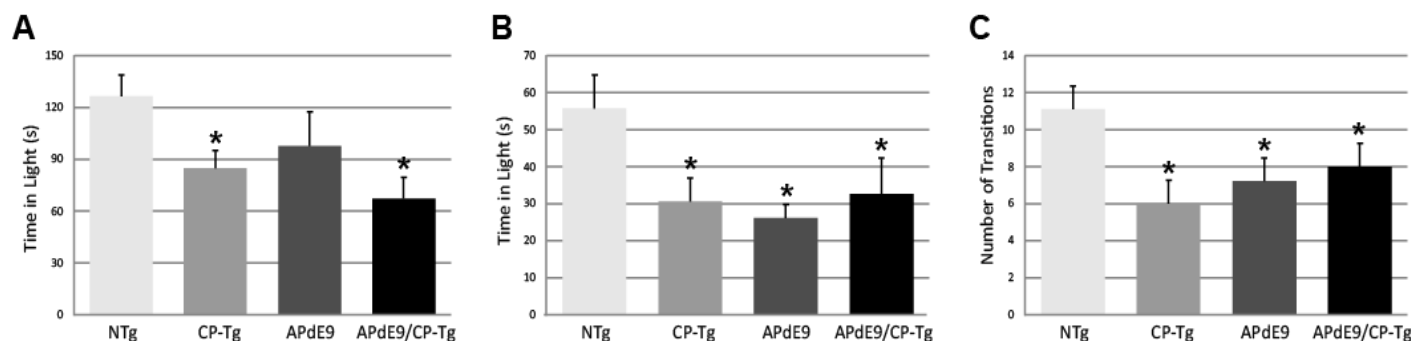

**Figure 2. Prostacyclin overexpression increased anxiety-like behavior as measured by light dark and elevated plus-maze tests.** (A) CP-Tg and APdE9/CP-Tg mice spent significantly less time in the light during light-dark exploration. (B) In the elevated plus-maze, all transgenic mouse lines spent significantly less time in the lit arms, and (c) and made fewer transitions between the open and closed arms (C) of the elevated plus maze. Bars are means  $\pm$  SEM,  $n = 8-10$  mice per group. \* $p < 0.05$  compared to NTg mice.

in a step-down passive avoidance test in gerbils subjected to forebrain ischemia (42). Additionally, PGI<sub>2</sub> appears to impact influence behavior and cognitive processing positively; CP-Tg mice contain a modified cyclooxygenase-1 enzyme linked to Prostaglandin E synthase, which increases PGI<sub>2</sub> production (43-45). In our previous work, we found that increased levels of PGI<sub>2</sub> improved short-term memory as the CP-Tg mice learned significantly faster in training compared to controls in a contextual fear conditioning test (46).

Several studies have suggested that PGI<sub>2</sub> may have some impact on neurodegenerative disorders such as Alzheimer's disease (47, 48). He et al. (49) was able to show that agonist-induced activation of the IP receptor-stimulated production of soluble APP $\alpha$ , a neuroprotective isoform of the amyloid precursor protein, in isolated human microvascular endothelial cells. Wang et al. (50) demonstrated that injections of PGI<sub>2</sub> into an amyloid precursor protein/presenilin 1 transgenic mouse model increased A $\beta$  levels and proposed this was due to upregulation of the amyloid cleaving proteins,  $\gamma$ -secretase A $\beta$ 1 $\alpha$ , and A $\beta$ 1 $\beta$ , via the PKA/CREB and JNK/c-Jun pathways.  $\gamma$ -secretases are responsible for cleavage of APP $\beta$  to produce the cytotoxic A $\beta$ <sub>1-42</sub> peptides, suggesting that PGI<sub>2</sub> may regulate amyloid-associated pathology. These data suggest that increased PGI<sub>2</sub> is likely to play a modulatory role in cognitive function associated with amyloid metabolism.

For this work, we evaluated the effect of PGI<sub>2</sub> overexpression in a model of neurodegenerative disease. CP-Tg mice were crossed to APdE9 mice, a model of Alzheimer's disease that develops prominent A $\beta$  pathology and develop spatial memory impairments by 12 months of age (51). APdE9/CP-Tg mice, along with age-matched controls, were subjected to behavioral tests to assess possible changes in cognitive and anxiety-like behaviors. To investigate the impact of prostacyclin overexpression on the amyloid phenotype, we performed A $\beta$  ELISAs on whole brain homogenates. We also investigated prostacyclin-mediated changes to the neurovasculature using immunohistochemical imaging.

## Results

### Impacts on non-cognitive behavior

Analysis of open field data, a test for locomotor activity and anxiety-like behavior, revealed that ambulation, resting, and margin times differed among the mouse lines. CP-Tg mice exhibited significant anxiety-like behavior measured by greater times spent resting and in the margin with less time spent moving (Fig. 1,  $p < 0.05$ ). APdE9 lines showed significant increases in ambulation and reductions in resting times, indicating an anxiolytic-like effect when compared to the CP-Tg or NTg controls (Fig. 1,  $p < 0.05$ ). Prostacyclin overexpression in the APdE9/CP-Tg mice did not affect amyloid-mediated anxiety-like

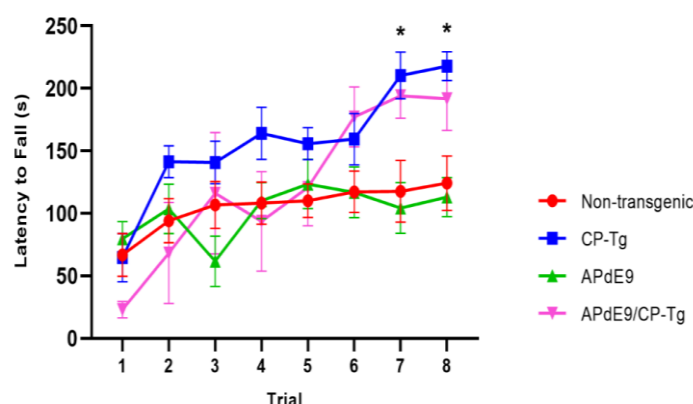

**Figure 3. Prostacyclin overexpression enhances motor learning and coordination.** In 6month old mice, both CP-Tg and APdE9/CP-Tg mice showed improved coordination on the rotarod, compared with NTg and APdE9 mice on trials 7 and 8. Bars are means  $\pm$  SEM,  $n = 7-8$  mice per group. \* $p < 0.05$  compared to NTg and APdE9 mice.

behavior as no differences were observed between the APdE9 mice and APdE9/CP-Tg mice (Fig. 1).

The light-dark exploration test and the elevated plus-maze were used to evaluate anxiety. In the light-dark exploration test, a decrease in exploratory behavior in the lighted area and a preference for the dark compartment was considered a measure of anxiety-like behavior. We found that prostacyclin overexpressing mice spent significantly less time in the light compartment than the NTg control mice (Fig. 2A,  $p < 0.05$ ). Anxiety-like behavior was also measured using an elevated plus-maze, with increased time in the lit open-arm of the plus-maze associated with anxiolytic behavior. Both the amyloid and prostacyclin expressing mice spent significantly less time in the open arms and made fewer transitions, indicative of anxiogenic behavior, compared to the non-transgenic control group (Fig. 2B and 2C,  $p < 0.05$ ).

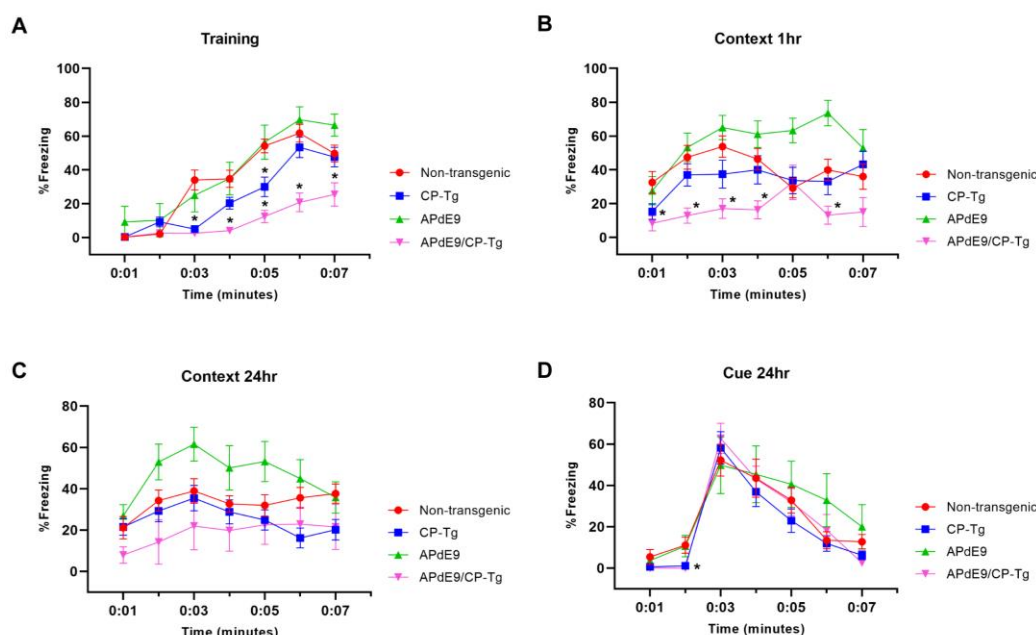

**Figure 4. APdE9/CP-Tg mice exhibit impaired learning.** (A) PGIS overexpression significantly decreased the percentage freezing time after the first and second shock (shock given at 2<sup>nd</sup> and 4<sup>th</sup> minute) of the training trial ( $p < 0.05$ ) while the combination of amyloid and prostacyclin further decreased freezing times during training. (B) APdE9 mice exhibited an enhanced short-term memory response while APdE9/CP-Tg mice exhibited a depressed short-term memory response. (C) CP-Tg and APdE9/CP-Tg mice exhibited worse performance in a contextual test of long term memory compared to APdE9 mice. (D) CP-Tg and APdE9/CP-Tg mice showed an initial delay in freezing at the 2<sup>nd</sup> minute; however, no significant differences were observed after application of the 3 minute tone from minute 3 to 6 in a cued assessment of long-term memory.  $N = 7-14$  mice per group. \* $p < 0.05$  compared to NTg mice.



### ***PGIS overexpression improves motor coordination***

Motor function and coordination was assessed using a motorized rotarod. CP-Tg and APdE9/CP-Tg mice had an increased latency to fall in trials 7 and 8 indicating PGIS overexpression increases coordination and balance in mice 6 months of age (Fig. 3,  $p < 0.05$ ).

### ***PGIS overexpression impairs associative learning***

Context/cue fear conditioning tests were run to assess prostacyclin-mediated changes in associative learning of AD mice measured by percent freezing. During training, mice were conditioned with three shocks paired with a tone. The APdE9/CP-Tg mice displayed delayed learning to the aversive shocks when compared to the APdE9 mice as well as the CP-Tg and NTg controls as the magnitude of the freezing response was decreased in the training period (Fig. 4A,  $p < 0.05$ ). CP-Tg mice also demonstrated delayed learning compared to the APdE9, and NTg controls after the first and second shock but had an increased fear response from that of the APdE9/CP-Tg mice for the 3<sup>rd</sup> shock in the last two minutes (Fig. 4A,  $p < 0.05$ ). APdE9 mice maintained comparable learning to that of the NTg control mice with no differences seen in percentage freezing during the entire training trial (Fig. 4A).

A contextual fear conditioning trial was performed 1 hour after training. In the same environment but with no tone presented, APdE9/CP-Tg freezing responses were significantly reduced

compared to that of NTg (Fig. 4B,  $p < 0.05$ ). The APdE9 mice showed a significant enhancement in freezing response during minutes 5 and 6 compared to the control (NTg and CP-Tg) mice (Fig. 4B,  $p < 0.005$ ).

In order to assess long-term memory consolidation, another contextual trial was performed 24 hours after training. The APdE9 mice maintained a high percentage of freezing times similar to the results seen in the 1-hour context trial (Fig. 4C,  $p < 0.05$ ). Percentage freezing times for the APdE9 mice were not significantly different from the NTg and CP-Tg controls. During a 24-hour cued conditioning trial where a 3-minute tone is presented in a different environment, all mice exhibited an increased freezing response to the tone with no significant differences by the end of the 7 minute trial period. However, CP-Tg and APdE9/CP-Tg mice did exhibit significantly more activity measured by lower percentage freezing, compared with NTg and APdE9 mice, before the tone was presented (Fig. 4D,  $p < 0.05$ ).

### ***Prostacyclin drives A $\beta$ production and increases amyloid burden***

An enzyme-linked immunosorbent assay of A $\beta$ 40 and A $\beta$ 42 was used to determine the impact of elevated PGI<sub>2</sub> synthesis on amyloid production in the APdE9 mouse model. At 17-21 months of age, the APdE9 and APdE9/CP-Tg mice showed significant increases in both PBS-soluble levels of A $\beta$ 40 and A $\beta$ 42 compared to the NTg or CP-Tg controls (Fig. 5A,  $p < 0.05$ ).

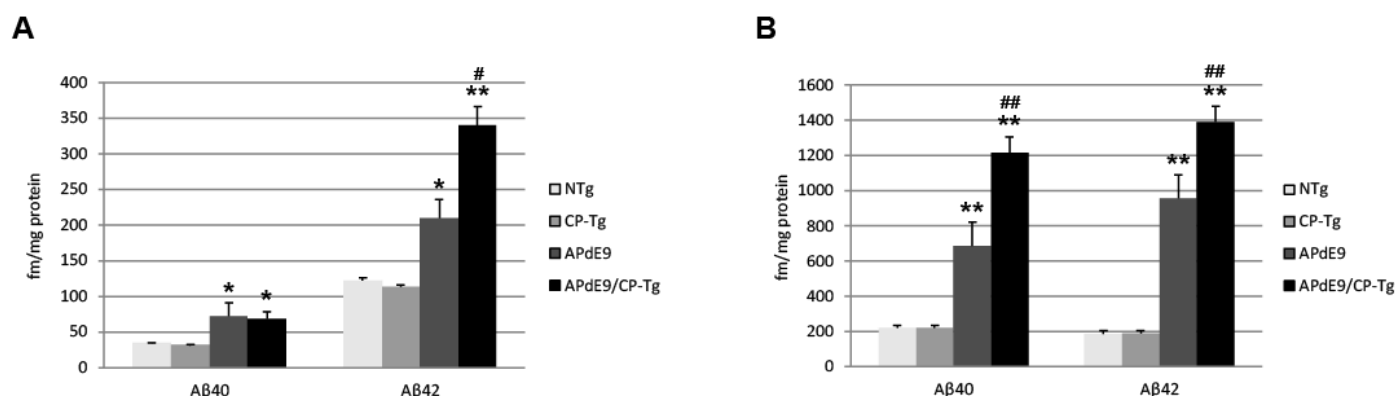

**Figure 5 Prostacyclin overexpression increases A $\beta$  production.** PBS- (A) and RIPA-soluble (B) A $\beta$ 40 and A $\beta$ 42 levels in APdE9 mice with prostacyclin overexpression. Bars are means  $\pm$  SEM,  $n = 10$  mice per group. \* $p < 0.05$  and \*\* $p < 0.005$  compared to control (non-transgenic and CP-Tg) mice. #,  $p < 0.05$  and ##,  $p < 0.05$  compared to APdE9 mice. A two-way ANOVA with a Tukey's HSD post-hoc was used to determine significant differences.

When comparing the APdE9/CP-Tg mice to the APdE9 controls, the double transgenic line exhibited comparable levels of soluble A $\beta$ 40 and had a selective increase in soluble A $\beta$ 42 (Fig. 5A,  $p < 0.05$ ). Levels of insoluble A $\beta$ 40 and A $\beta$ 42 in the brain were measured using a RIPA extraction. Again, the APdE9 and APdE9/CP-Tg mice had increased levels of both A $\beta$ 40 and -42 compared to the NTg or CP-Tg controls (Fig. 5B,  $p < 0.0005$ ), with the double transgenic line having an approximately 1.7-fold and 1.5-fold increases in insoluble A $\beta$ 40 and 42, respectively, compared to the APdE9 mice.

Increased production was reflected in higher amyloid burdens. Compared to the APdE9 mice, the APdE9/CP-Tg mice contained a significantly increased burden. The average plaque diameter in the APdE9/CP-Tg mice was significantly larger, with a mean 40% increase in plaque volume compared to APdE9 mice, (Fig. 6,  $p < 0.05$ ). Although existing plaques were significantly larger, a notable finding from this study was that there was no significant difference in the number of plaques between different lines.

### *Loss of pericyte coverage in prostacyclin-overexpressing lines*

A colocalization study was performed to assess the effect of prostacyclin overexpression on pericyte death in an AD mouse model. The colocalization of CD-13-

positive pericytes with collagen IV-positive microvessels was expressed as Manders Colocalization Coefficients (MCC; M1: the fraction of CD-13 overlapping collagen IV, M2: the fraction of collagen IV overlapping CD-13) (Dunn 2011). In NTg mice, approximately 79% of CD-13 positive pericytes colocalized with collagen IV-positive basement membrane, but in CP-Tg mice, this was significantly decreased ( $F(3,95) = 13.41$ ,  $p < 0.05$ ) to nearly 73% (Table 1). Both amyloid-expressing models exhibited further reductions in pericyte coverage; APdE9 mice had 65% coverage, and APdE9/CP-Tg had 62% (Table 1,  $p < 0.05$ ). Representative images of each genotype are presented in Figure 7.

### *APdE9/CP-Tg mice exhibit severe vascular pathology*

To examine prostacyclin-mediated structural changes to the cerebral vasculature, we examined stains of the vessel basement membrane using confocal microscopy. 3D image stacks were analyzed using a vessel tracing software plugin in ImageJ. Vascular parameters, including total vessel length, branch number and length, vessel cross-section and diameter, and fractional vessel volume were quantified in the cortex of 17-20-month-old NTg, CP-Tg, APdE9, and APdE9/CP-Tg mice. The vascular parameters are reported as a percent of the total vessel volume imaged. APdE9/CP-Tg mice had significantly shorter and

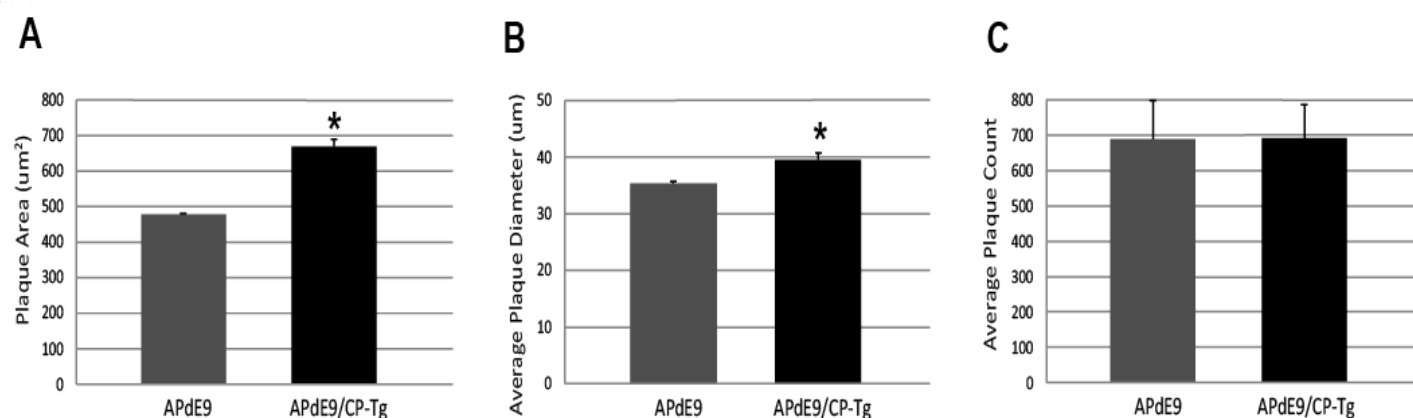

**Figure. 6 Prostacyclin overexpression increases plaque area and diameter in the brains of APdE9 mice.** Immunohistochemistry to detect amyloid plaques (4G8) in coronal brain slices from APdE9 mice (A) and APdE9/CP-Tg mice (B). Scale bar = 200  $\mu$ m. Measurements in five section of whole cortex determined (C) average plaque area, (D) average plaque diameter (D), and (E) cumulative plaque count per subject. Bars are means  $\pm$  SEM,  $n = 10$  mice per group. \*\*\* $p < 0.0005$  and \* $p < 0.05$  compared to APdE9 control mice. A one-way ANOVA was used to determine significant differences.

|             | MCC M1 |       | MCC M2 |       | Pearson's Coefficient |       |
|-------------|--------|-------|--------|-------|-----------------------|-------|
|             | Mean   | SEM   | Mean   | SEM   | Mean                  | SEM   |
| NTg         | 0.808  | 0.012 | 0.788  | 0.020 | 0.859                 | 0.013 |
| CP-Tg       | 0.796  | 0.016 | #0.728 | 0.022 | 0.774                 | 0.019 |
| APdE9       | *0.852 | 0.011 | *0.652 | 0.018 | 0.783                 | 0.008 |
| APdE9/CP-Tg | 0.788  | 0.011 | *0.624 | 0.023 | 0.704                 | 0.016 |

**Table 1. Effect of PGIS overexpression on colocalization of microvessels and pericytes.** Pearson's and Manders Colocalization Coefficients (MCC) from dual immunofluorescent stains of collagen IV within the basement membrane of microvessels and CD-13 positive pericytes. M1 signifies the fraction of immunodetectable CD-13-positive pericytes overlapping Collagen IV-positive microvessels. M2 signifies the fraction of immunodetectable collagen IV-positive basement membrane overlapping CD-13-positive pericytes. \*p < 0.05 compared to NTg and CP-Tg mice. #p < 0.05 compared to NTg mice.

fewer vessels compared to the other models (Fig. 8B-D, p<0.05). CP-Tg mice were found to have a significant increase in both total vessel length and the number of branches compared to NTg mice (Fig. 8B-C, p<0.05). APdE9/CP-Tg mice also presented with the smallest vessel cross-sections and diameters, APdE9 mice with the second smallest and then CP-Tg mice when compared to NTg mice (Fig. 8E-F, p<0.05). The imaged volume fraction occupied by vessels was largest for NTg mice and smallest for APdE9/CP-Tg mice (Fig. 7G, p<0.05).

## Discussion

In this study, we characterized the effect of upregulated PGI<sub>2</sub> production on behavior, amyloid beta pathology and vessel morphology in a mouse model of AD. Previous work has implicated that exogenous application of PGI<sub>2</sub> recovers neurological activity in animal models of ischemia or stroke, improves cerebral blood flow, and prevents pericyte loss and vascular leakage after LPS-induced spinal cord injury in mice (41, 42, 59, 60).

We first addressed the possible neuroprotective effects of PGI<sub>2</sub> overexpression on cognitive and non-cognitive behaviors. In an open field assessment of locomotor activity, both of the amyloid-expressing lines (APdE9 and APdE9/CP-Tg), displayed hyperactivity when compared to the CP-Tg or NTg controls at 12 months of age. CP-Tg mice exhibited decreased activity and spent a larger amount of time

along the margin of the field, similar to findings from our previous work (46). Notably, PGI<sub>2</sub> overexpression, alone and with the APdE9 phenotype, significantly improved coordination by the last two rotarod trials. Elevated plus-maze and light-dark tests were used to assess anxiety-like behavior. Both measures of anxiety-like behavior revealed increased anxiety in all transgenic models (CP-Tg, APdE9, and APdE9/CP-Tg) measured by time spent in the lit compartment and open arms. Previous reports of the APdE9 mouse model observed similar results as the APP<sup>swe</sup>/PS1<sup>dE9</sup> mice displayed increased exploration in an open field and open arms of an elevated plus-maze (51). Notably, PGI<sub>2</sub> overexpression did not affect anxiety-like behavior in the APdE9 model as the APdE9/CP-Tg mice performed similarly to APdE9 mice. However, PGI<sub>2</sub> overexpression was sufficient to produce an anxiety phenotype. Recent work has suggested that activation of the IP receptor, a cAMP-dependent PKA pathway, may be sufficient to drive stress responses *in vivo* (61). Stimulation of this pathway leads to activation of CRE (cAMP-responsive elements) binding proteins in the nucleus to synthesize new proteins that alter fear learning and memory formation (61). Increased expression of prostacyclin also appeared to exert detrimental effects on other cognitive tests. We observed impaired learning in APdE9/CP-Tg mice during an associative fear conditioning test. Mice were conditioned to a cue and then assessed for contextual and cued memory to the environment or a tone, respectively. During training, APdE9/CP-Tg mice exhibited a significantly reduced freezing response compared to controls indicating a delay in memory acquisition. Additionally, CP-Tg mice also showed delayed acquisition when compared to non-transgenic controls at the third and fifth minutes following the 2-minute and 4-minute tone-shock pairings. A hippocampal-dependent contextual test was performed 1 hour and 24 hours after training. APdE9/CP-Tg mice again showed reduced freezing response compared to all controls at one hour, and 24 hours were comparable with CP-Tg and non-transgenic controls.

Conversely, previous studies using an exogenous application of a prostacyclin analog, MRE-269, after stroke in aged rats, was able to recover long-term



locomotor and somatosensory functions (59). Although IP receptor deletion in mice can be neuroprotective with acute insults such as ischemic damage (62), PGI<sub>2</sub> overexpression may exert long term adverse effects. Our work demonstrates that elevated activation of IP receptor signaling results in reduced hippocampal memory function in the presence of amyloid-beta insults. Fear behavior during a 24-hour auditory cue test was comparable between all groups. As cued conditioning is hippocampal-independent as it requires the use of the amygdala, our results indicate the combination of amyloid and prostacyclin have little to no effect on amygdala-mediated memory retention.

We also find that PGI<sub>2</sub> overexpression significantly increases amyloid production in APdE9/CP-Tg mice. ELIZAs of whole-brain homogenates show a more than 1.5-fold increase in insoluble Aβ<sub>40</sub> and Aβ<sub>42</sub> in the double transgenic line compared to the APdE9 mice. Amyloid burden is directly affected by prostacyclin expression. Intriguingly, these increases are associated with a selective increase of Aβ<sub>42</sub> in the soluble pool, suggesting that prostacyclin may selectively bias γ-secretase processing. Another interesting observation in this study was the finding that prostacyclin caused an average 40% increase in plaque diameter, but without a detectable increase in the overall number, perhaps suggesting that factors involved in Aβ metabolism may be modulated through the IP receptor. These findings are supported by recent work on prostacyclin signaling influencing APP processing mechanisms. Agonist activation of the IP receptor was found to increase the expression of the amyloid precursor protein, resulting in the increased production of Aβ (49). Another report suggests that downstream activation of the PKA/CREB pathway after prostacyclin injections induces upregulation of γ-secretase cleaving enzymes and leads to an accumulation of Aβ c-terminal fragments in an APP/PS1 transgenic mouse model (50).

Substantial evidence has shown that disruptions to the neurovasculature are evident in humans and mouse models of Alzheimer's disease (AD) that directly coincide with an earlier onset and accelerated progression of AD-related pathologies (63-65). These disruptions include altered cerebrovascular functions

such as reduced cerebral blood flow velocities and higher resistance indexes (66) that have been correlated with impaired cognition (67, 68). Structural abnormalities include changes such as capillary atrophy, cell degeneration, loss of tight junction proteins within the blood-brain barrier and basement membrane thickening due to cerebral amyloid angiopathy (CAA) in both mouse models and individuals with AD (69-73). However, a complete description of how vascular pathology can affect AD progression, and the role of the inflammatory pathway in vascular and neuronal injuries, is still being investigated.

Using a volumetric analysis, we measured the impact of PGI<sub>2</sub> overexpression on vascular structure within the brain, quantifying measures of vessels such as length, branching, diameter, and volume. Our

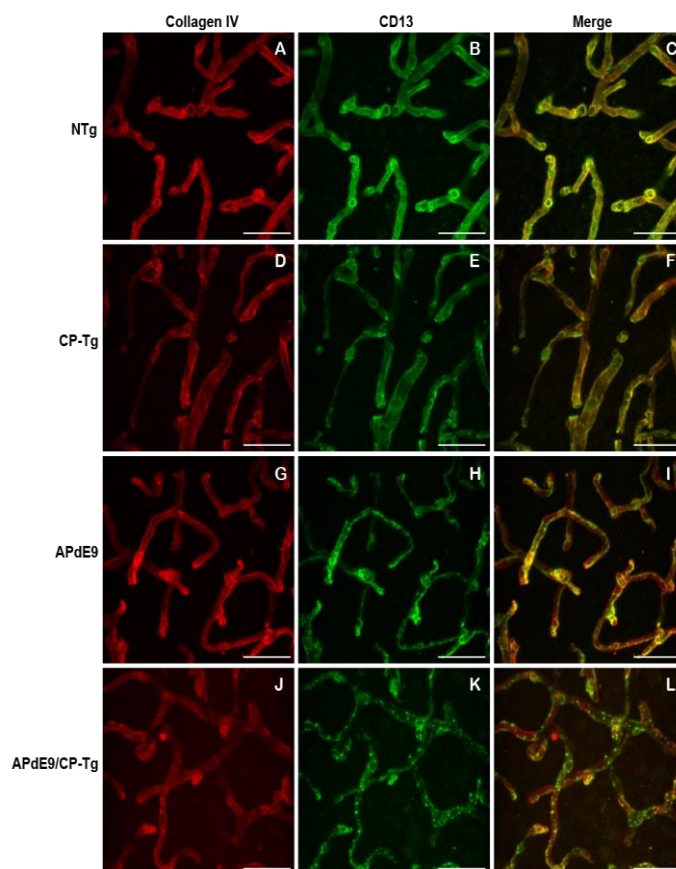

**Figure 7. Loss of continuous pericyte coverage in APdE9/CP-Tg mice.** 100X confocal image stacks of collagen IV-positive microvessels and CD13-positive pericytes from the cortex of 17-20-month-old NTg, CP-Tg, APdE9, and APdE9/CP-Tg mice. Scale bar = 30 μm



results show that the combination of PGI<sub>2</sub> overexpression with the amyloid phenotype was quite detrimental and worsened multiple measures of vascular structure. Compared with the control group, APdE9/CP-Tg mice had fewer vessels with shorter, smaller diameters. Compared to NTg mice, APdE9

mice had significantly smaller branch lengths, cross-sections, and diameters, as well as a reduction in total volume. Reductions in microvascular density and vessel constriction have been reported in individuals with AD and mouse models of AD. Other studies have suggested that amyloid beta insults can increase

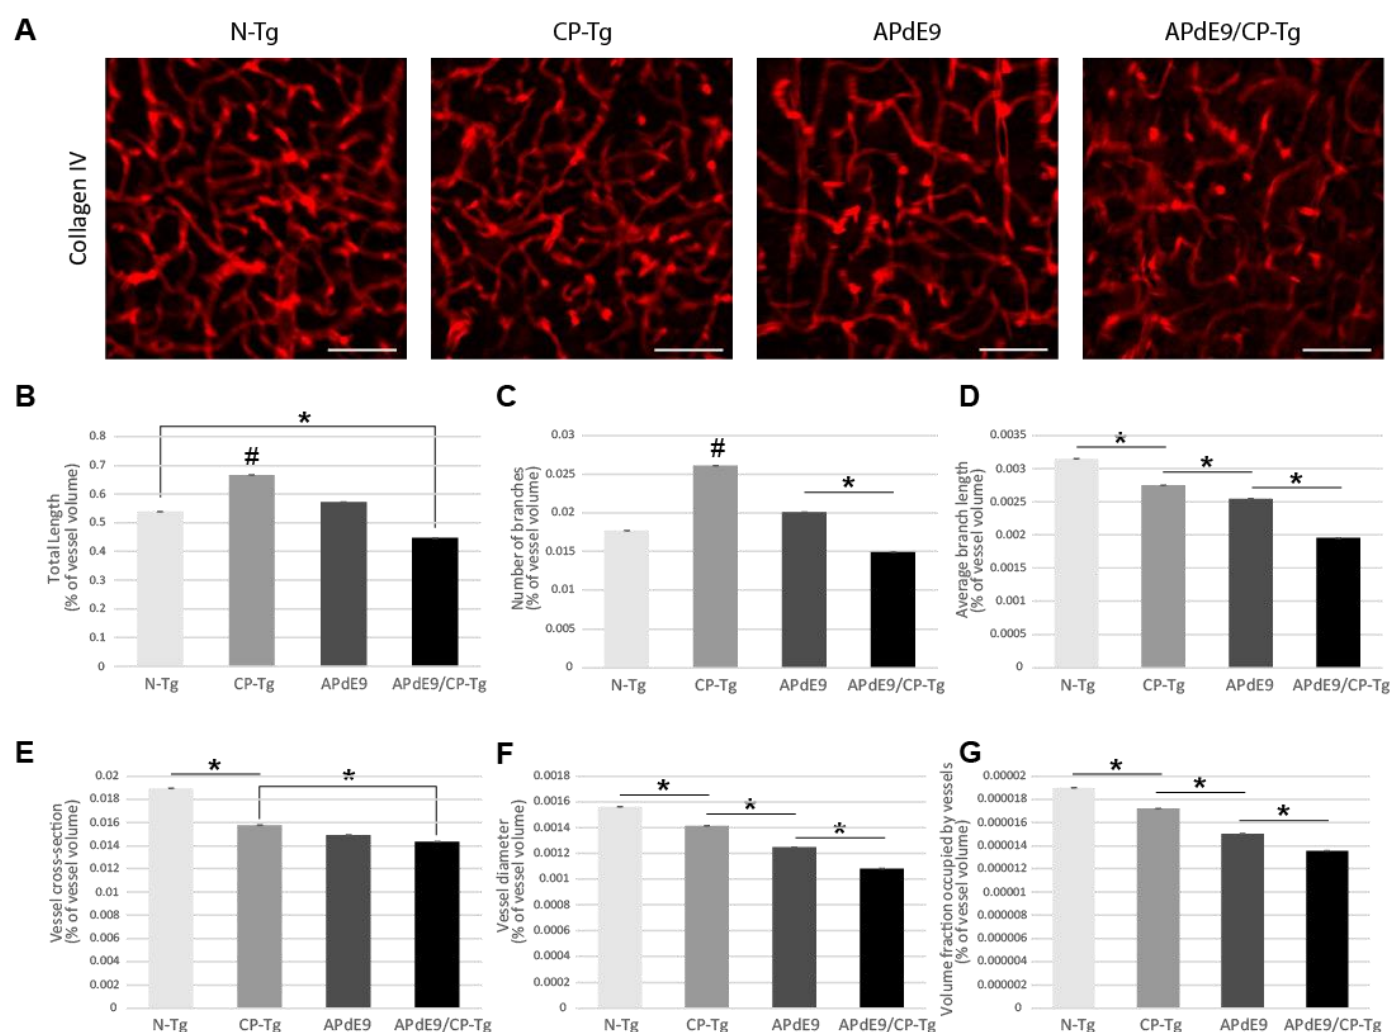

**Figure 7. Cerebral vasculature structures are damaged by prostacyclin overexpression in APdE9/CP-Tg mice.** Quantification of vascular structures, by collagen IV staining, in the cortex of 17-20-month old NTg, CP-Tg, APdE9, and APdE9/CP-Tg mice. (A) 40X 60  $\mu$ m thick confocal image stacks of collagen IV-positive microvessels were used for vessel tracing analysis. Scale bar = 50  $\mu$ m (B) APdE9/CP-Tg mice had significantly fewer vessels compared to NTg or CP-Tg and APdE9 mice, while CP-Tg mice had significantly more. (C) APdE9/CP-Tg mice had significantly fewer number of vessel branches compared to NTg or CP-Tg and APdE9 mice, while CP-Tg mice had significantly more. (D) Branch length is significantly reduced in all models compared to NTg mice; CP-Tg mice show the least reduction in length while APdE9/CP-Tg mice show the greatest. (E-F) Cortical vessel cross-section and diameter were significantly smaller in all models compared to NTg mice with APdE9 mice exhibiting the greatest amount of smaller, constricted vessels. (G) Of the volume of vessels imaged for each genotype, NTg mice maintained the greatest fraction of vessels imaged while APdE9/CP-Tg mice contained the fewest. \*p<0.05; #p<0.05 compared to NTg, APdE9, and APdE9/CP-Tg mice. Bars are means  $\pm$  SEM, n = 5 mice per group.

microvascular density in mice (74), and there is evidence of angiogenic vessels, accompanied by higher microvessel density, in the hippocampus of post-mortem tissues of individuals diagnosed with AD (75). Moreover, some studies have found no changes in vessel volume in both humans and APP/PS1 mice (76-78). In our studies, we also found an increase in total vessel length and degree of branching in the CP-Tg mice compared to their non-transgenic controls or both amyloid models. However, the CP-Tg mice exhibited significantly smaller diameters and cross-sections and had a lower volume than that of NTg mice, indicating that the overproduction of PGI<sub>2</sub> is detrimental to the neurovasculature.

The regulatory function of the IP receptor in the vasculature of the brain is poorly understood. Consequently, alterations in vasculature led us to examine perivascular cells or pericytes of the BBB. These cells maintain the integrity of the cerebral vasculature by promoting tight junction protein expression, facilitate cell to cell alignment and are integral to preventing leakage of neurotoxic macromolecules that lead to neuronal damage (79). Application of PGI<sub>2</sub> after LPS-induced vascular damage in a mouse model of spinal cord injury was able to rescue pericyte loss and concurrent leakage of blood components into the CNS (60). Previous work has reported that accumulation of amyloid  $\beta$  in the neurovasculature of AD individuals was correlated with reduced coverage of pericytes on capillaries in AD brains compared to controls (71). Furthermore, studies of pericyte-deficient, APP<sup>sw/0</sup> (Swedish mutation) mice showed that they had accelerated levels of amyloid-beta deposition, increased tau pathology, and increased neuronal degeneration by nine months of age when compared to AD control mice (80). In our studies, we evaluated the percentage of CD-13-positive pericytes that co-located with the vessels' basement membrane as a measure of coverage. CP-Tg mice exhibited a significant reduction in pericyte coverage compared to non-transgenic controls, demonstrating that PGI<sub>2</sub> plays a modulatory role in pericyte function. We identified significant reductions in pericyte coverage of APdE9 and APdE9/CP-Tg mice compared to Ntg and CP-Tg mice. However, no difference was observed between APdE9 and

APdE9/CP-Tg mice, indicating that amyloid-dependent reductions in pericyte coverage are unaffected by prostacyclin overproduction.

## Conclusions

Early changes in the Alzheimer's disease include progressive dysfunction in cerebral hemodynamics, changes in vascular structure, and impaired clearance of amyloid-beta proteins, changes that often occur substantially before cognitive deficits become evident. The persistent upregulation of inflammatory and immune responses have been strongly associated with age-dependent cognitive decline (11).

A variety of inflammatory conditions, such as AD, are associated with upregulated prostanoid production produced through COX enzyme metabolism. Epidemiological evidence suggests a preventative benefit for using nonsteroidal anti-inflammatory drugs (NSAIDs) as the coincidence of individuals taking NSAIDs long-term for rheumatoid arthritis reduces the risk of developing AD (81). NSAIDs are inhibitors of the cyclooxygenase (COX) enzyme pathway. In clinical studies for neurodegenerative disease, the chronic administration of NSAIDs have suggested that they may be of some benefit for Alzheimer's disease, but the severe side effects associated with long-term use of these agents has limited additional clinical testing (81).

This study evaluated prostacyclin overexpression in a model of Alzheimer's disease, using in a transgenic line that favors the production of PGI<sub>2</sub> over other metabolites of the COX cascade. In studies of COX metabolism, there is abundant literature suggesting that that increased production of thromboxanes and prostaglandins primarily contribute to inflammatory, degenerative processes, whereas prostacyclin is thought to decrease inflammation and function in both vasoprotective and neuroprotective roles. Based on these studies, we hypothesized that prostacyclin would be strongly neuroprotective and vasoprotective, and would slow the development, in a model of AD.

Surprisingly, we found that PGI<sub>2</sub> expression worsened multiple measures associated with the degenerative pathology. We observed that PGI<sub>2</sub> overexpression influences anxiety, possibly due to

increases in cAMP activity that has been reported to alter gene expression of proteins involved with the fear response. APdE9 and APdE9/CP-Tg mice exhibited the same level of anxiety as the CP-Tg mice in the LD and EPM behavioral tests suggesting PGI<sub>2</sub> does not affect anxiety in the AD model. In a fear conditioning test, the APdE9/CP-Tg mice exhibited significantly worse associative memory acquisition and consolidation than APdE9 controls. Although earlier reports using PGI<sub>2</sub> analogs suggested activation of the IP receptor could be neuroprotective, CP-Tg mice presented with memory deficits when compared to non-transgenic controls. In our studies, increased production of PGI<sub>2</sub> accelerated amyloidogenesis by more than 50%, significantly increasing the production of soluble and insoluble A $\beta$  peptides. Overexpression of PGI<sub>2</sub> severely impacted multiple measures of vascular health, a process that was exacerbated with amyloid-beta pathology. Given that prostacyclin is largely protective when expressed in peripheral tissue, our observations suggest that IP signaling is fundamentally different in the cerebrovasculature.

In conclusion, we have provided evidence that chronic production of the PGI<sub>2</sub> pathway is potentially pathological and may accelerate the development of changes typically associated with the Alzheimer's disease phenotype. Future studies should explore the mechanism of PGI<sub>2</sub> signaling through its respective receptor within specific cell types of the CNS to better understand the role PGI<sub>2</sub> plays in influencing the progression of neurodegenerative disease.

## **Materials and Methods**

### ***Animal Model***

All experiments were conducted following approved IACUC guidelines, using approved protocols, and mice were housed at the University of Houston Animal Care Facility. Mice were kept in group cages and exposed to a 12-hour light/ 12-hour dark cycle. To develop the APdE9/CP-Tg mouse model, CP-Tg mice, that express a hybrid enzyme complex linking COX-1 to PGIS by an amino acid linker of 10 residues (COX-1-10aa-PGIS) (43-45), were crossed to APdE9 mice, a bigenic model expressing the human APP Swedish mutation and the exon-9-deleted variant of presenilin-

1 (dE9) (52, 53). PCR analysis was used to confirm the genotype. Heterozygous mice were used for all studies. Studies composed of a balanced mixture of male and female mice.

### ***Open Field Activity***

The open-field test was used to analyze exploratory behavior within a 60 cm X 40 cm open chamber in normal lighting conditions. Each animal was placed in the center of the apparatus and were given 30 minutes to freely explore the arena. Movement was monitored by a computer-operated system (Optomax, Columbus Instruments; OH) that recorded the time each mouse spent moving, resting or along the margin of the arena.

### ***Light Dark Exploration***

As a measure of anxiety-like behavior a single mouse is placed in an apparatus consisting of a light and dark compartment separated by a single opening and their movements are recorded (46). Mice were subjected to light-dark exploration test to evaluate anxiety-like behavior at three and six months of age. The light-dark box consisted of a light compartment (27 cm  $\times$  27 cm  $\times$  27 cm) and a dark compartment (27 cm  $\times$  18 cm  $\times$  27 cm) separated by a partition with a single opening (7 cm  $\times$  7 cm) to allow passage between compartments as previously described. More time spent in the dark compartment and fewer transitions is considered anxiogenic. Each trial lasted 5 minutes. The number of transitions were measured manually, with the observer blinded to the genotype.

### ***Elevated Plus-Maze***

Anxiety-like behavior can be assessed by utilizing an elevated-plus maze where the mouse has the option to explore two open freely and lit arms, or two arms closed in with blinders. The plus-shaped apparatus is 40 cm above the ground, and mouse movements were recorded by an overhead camera. Time in the light and number of transitions between arms were manually recorded with the observer blinded to the genotype.

### ***Rotarod***

An accelerating cylindrical drum Rotamex Rotarod machine (Columbus Instruments; Columbus, OH) was used to evaluate motor learning and coordination in 12

month old animals. The rotatod consists of horizontal accelerating rods (4-40 rpm) and plastic partitions between each mouse. The mouse is then subjected to 4 trials a day for two days with 15-minute intervals between each trial. A trial ended when the mouse fell off the rod, time elapsed 300 seconds, or the mouse became inverted twice in the same trial without falling.

### ***Fear Conditioning***

Testing for contextualized and cued fear conditioning was followed as previously described in mice at 6 months of age (54, 55). A standard fear conditioning chamber (13 x 10.5 x 13 cm, Med Associates) with 19 metal rods equally spaced on the floor was used to condition the mice. Training consisted of a 7-minute session where a single mouse was subjected to a foot shock (2-sec, 0.75mA) paired with an auditory tone at 120, 240, and 360 seconds. To test for conditioning to contextual cues, the mouse was returned to the chamber 1 hour and 24 hours after the training session. The contextual tests were also 7-minute sessions. However, the shock was not presented. For the 24 hour cue test, mice were returned to the chamber after the surroundings and smell had been altered and during the 7-minute session a 3-minute tone was presented from minute 3 to 6. Freezing behavior was measured using computer software (FreezeFrame, Med Associates/Actimetrics).

### ***A $\beta$ ELISA***

Mice were sacrificed after behavioral testing, and brains were collected. Briefly, hemibrains were homogenized in 1X PBS buffer (pH = 7.4, 1.0 ml/150 mg of tissue) using a PowerMax AHS 200 homogenizer and centrifuged at 14,000xg for 30 min at 4°C. The supernatant was collected and the pellet re-extracted in RIPA buffer (50 Mm Tris-HCl, 150 mM NaCl, 1 % Triton X-100, 0.5% Deoxycholate, 0.1% SDS, 1X PIC, pH = 8.0) and the supernatant collected again. Sandwich ELISAs were performed for monomeric A $\beta$ 42 using the antibodies 2.1.3 (A $\beta$ 42 end specific, to capture) and Ab9 (human sequence A $\beta$ 1-16, to detect). Standards and samples were added to plates after coating the wells with 2.1.3 antibody in PBS and blocking with Synblock (Pierce). Detection antibodies were then applied and developed with TMB

reagent (Kirkegaard and Perry Laboratories). The reaction was stopped using 6% *o*-phosphoric acid and read at 450 nm in a BioTek plate reader.

### ***Quantification of Amyloid Pathology***

4G8 antibody (1:500 dilution; Covance, cat no. SIG-39220) was used to detect amyloid pathology in 10  $\mu$ m thick coronal brain slices. Slices were blocked for endogenous peroxidase using 3% hydrogen peroxide and blocked using 5% serum. Primary antibody was applied and incubated overnight at 4°C followed by a biotinylated secondary goat anti-mouse antibody (Jackson ImmunoResearch) incubation for 20 minutes at room temperature and incubation with a Streptavidin/HRP label (Jackson ImmunoResearch), followed by visualization with DAB.

Plaque expression in the entire cortex was quantified for each subject. Briefly, five brain sections, equally spaced through the cortex, from each subject were digitally captured and montaged at 10X using an Olympus DSU system using Neurolucida (Microbrightfield). The entire cortex was outlined, and Image J particle analysis with thresholding was used to quantify total amyloid burden, number and average size for five sections. Studies were performed blinded for the genotype of each subject.

### ***Immunofluorescence Staining***

The primary antibodies used were Collagen IV (1:400 dilution; Cosmo Bio, Catalog Number LSL-LB1403) and CD13 (1:100 dilution; R&D Systems, Catalog Number AF2335). Mice were sacrificed by decapitation, and brains were dissected. Brains were postfixed by immersion in Accustain (Sigma Aldrich). After fixation, brains were cryoprotected in 30% sucrose and cut into 60  $\mu$ m thick sections with a cryostat. Free-floating coronal brain slices were subjected to a protein block at room temperature for 30 minutes. Slices were then incubated with primary antibodies at their respective concentrations overnight at 4°C, followed by consecutive incubations of biotinylated anti-rabbit secondary antibody (1:200; Jackson ImmunoResearch) and biotinylated anti-goat secondary antibody (1:200; Jackson ImmunoResearch) both for 1 hour at room temperature. DyLight



fluorophores (Jackson Immunoresearch) were added after each secondary incubation.

### ***Confocal Microscopy Analysis***

Quantification of vessel parameters and pericyte coverage was performed on 60 µm microtome brain slices. Five slices evenly spaced between plates 40 and 65 of the Franklin and Paxinos Mouse Brain Atlas (56) were selected from each of five mice in each genotype for immunofluorescence staining. Blood vessels were visualized by collagen IV and pericytes by CD13 immunostaining. Three randomly selected areas of the cortex from each of the five slices were used for analysis. Z-stacks of 60 µm thickness were captured using a Confocal LS microscope (THOR Labs). Quantification of vessel parameters was performed using a blood vessel and network analysis plugin, Tube Analyst, in ImageJ (57). Pericyte coverage analysis was performed using the ImageJ JACoP plugin as previously described (58). All z-stacks were processed with background subtraction and analyzed using automatic thresholding.

### ***Statistical Analysis***

Results for the contextualized and cued fear conditioning assays were analyzed using a repeated measures ANOVA; we analyzed all other data using factorial ANOVA followed by Fisher LSD post hoc comparisons using Statistica (Tibco Software). A *p* value less than 0.05 was considered significant. All values are represented as S.E.M.

### **End Matter**

#### ***Author Contributions and Notes***

T.R.W., O.M, P.M, D.M, and J.L.E designed research; T.R.W, O.N., C.V, S.M., M.S, and T.B performed research, T.R.W., C.V., O.N, T.B., and J.L.E analyzed data; and T.R.W. and J.L.E wrote the paper.

#### ***Acknowledgments***

The authors declare no conflict of interest.

### **References**

1. Eikelenboom P, Hack CE, Rozemuller JM, Stam FC. Complement activation in amyloid plaques in Alzheimer's dementia. *Virchows Arch B Cell Pathol Incl Mol Pathol*. 1989;56(4):259-62. Epub 1989/01/01. PubMed PMID: 2565620.
2. Itagaki S, McGeer PL, Akiyama H. Presence of T-cytotoxic suppressor and leucocyte common antigen positive cells in Alzheimer's disease brain tissue. *Neurosci Lett*. 1988;91(3):259-64. Epub 1988/09/12. PubMed PMID: 2972943.
3. Rogers J, Luber-Narod J, Styren SD, Civin WH. Expression of immune system-associated antigens by cells of the human central nervous system: relationship to the pathology of Alzheimer's disease. *Neurobiol Aging*. 1988;9(4):339-49. Epub 1988/07/01. PubMed PMID: 3263583.
4. McGeer PL, Itagaki S, Tago H, McGeer EG. Reactive microglia in patients with senile dementia of the Alzheimer type are positive for the histocompatibility glycoprotein HLA-DR. *Neurosci Lett*. 1987;79(1-2):195-200. Epub 1987/08/18. PubMed PMID: 3670729.
5. Casolini P, Catalani A, Zuena AR, Angelucci L. Inhibition of COX-2 reduces the age-dependent increase of hippocampal inflammatory markers, corticosterone secretion, and behavioral impairments in the rat. *J Neurosci Res*. 2002;68(3):337-43. Epub 2002/07/12. doi: 10.1002/jnr.10192. PubMed PMID: 12111864.
6. Starr ME, Evers BM, Saito H. Age-associated increase in cytokine production during systemic inflammation: adipose tissue as a major source of IL-6. *J Gerontol A Biol Sci Med Sci*. 2009;64(7):723-30. Epub 2009/04/21. doi: 10.1093/gerona/glp046. PubMed PMID: 19377014; PMCID: PMC2844135.
7. Bruunsgaard H, Pedersen BK. Age-related inflammatory cytokines and disease. *Immunol Allergy Clin North Am*. 2003;23(1):15-39. Epub 2003/03/21. PubMed PMID: 12645876.

8. Cribbs DH, Berchtold NC, Perreau V, Coleman PD, Rogers J, Tenner AJ, Cotman CW. Extensive innate immune gene activation accompanies brain aging, increasing vulnerability to cognitive decline and neurodegeneration: a microarray study. *J Neuroinflammation*. 2012;9:179. Epub 2012/07/25. doi: 10.1186/1742-2094-9-179. PubMed PMID: 22824372; PMCID: PMC3419089.
9. Noble JM, Manly JJ, Schupf N, Tang MX, Mayeux R, Luchsinger JA. Association of C-reactive protein with cognitive impairment. *Arch Neurol*. 2010;67(1):87-92. Epub 2010/01/13. doi: 10.1001/archneurol.2009.308. PubMed PMID: 20065134; PMCID: PMC4426905.
10. Holmes C, Cunningham C, Zotova E, Woolford J, Dean C, Kerr S, Culliford D, Perry VH. Systemic inflammation and disease progression in Alzheimer disease. *Neurology*. 2009;73(10):768-74. Epub 2009/09/10. doi: 10.1212/WNL.0b013e3181b6bb95. PubMed PMID: 19738171; PMCID: PMC2848584.
11. Simen AA, Bordner KA, Martin MP, Moy LA, Barry LC. Cognitive dysfunction with aging and the role of inflammation. *Ther Adv Chronic Dis*. 2011;2(3):175-95. Epub 2011/05/01. doi: 10.1177/2040622311399145. PubMed PMID: 23251749; PMCID: PMC3513880.
12. McGeer PL, McGeer E, Rogers J, Sibley J. Anti-inflammatory drugs and Alzheimer disease. *Lancet*. 1990;335(8696):1037. Epub 1990/04/28. PubMed PMID: 1970087.
13. McGeer PL, Akiyama H, Itagaki S, McGeer EG. Activation of the classical complement pathway in brain tissue of Alzheimer patients. *Neurosci Lett*. 1989;107(1-3):341-6. Epub 1989/12/15. PubMed PMID: 2559373.
14. McGeer PL, Itagaki S, Tago H, McGeer EG. Occurrence of HLA-DR reactive microglia in Alzheimer's disease. *Ann N Y Acad Sci*. 1988;540:319-23. Epub 1988/01/01. PubMed PMID: 3061340.
15. Stewart WF, Kawas C, Corrada M, Metter EJ. Risk of Alzheimer's disease and duration of NSAID use. *Neurology*. 1997;48(3):626-32. Epub 1997/03/01. PubMed PMID: 9065537.
16. Rich JB, Rasmusson DX, Folstein MF, Carson KA, Kawas C, Brandt J. Nonsteroidal anti-inflammatory drugs in Alzheimer's disease. *Neurology*. 1995;45(1):51-5. Epub 1995/01/01. PubMed PMID: 7824134.
17. Rogers J, Kirby LC, Hempelman SR, Berry DL, McGeer PL, Kaszniak AW, Zalinski J, Cofield M, Mansukhani L, Willson P, et al. Clinical trial of indomethacin in Alzheimer's disease. *Neurology*. 1993;43(8):1609-11. Epub 1993/08/01. PubMed PMID: 8351023.
18. Breitner JC, Gau BA, Welsh KA, Plassman BL, McDonald WM, Helms MJ, Anthony JC. Inverse association of anti-inflammatory treatments and Alzheimer's disease: initial results of a co-twin control study. *Neurology*. 1994;44(2):227-32. Epub 1994/02/01. PubMed PMID: 8309563.
19. Edelman AB, Jensen JT, Doom C, Hennebold JD. Impact of the prostaglandin synthase-2 inhibitor celecoxib on ovulation and luteal events in women. *Contraception*. 2013;87(3):352-7. Epub 2012/08/21. doi: 10.1016/j.contraception.2012.07.004. PubMed PMID: 22902348; PMCID: PMC4040982.
20. Vitale P, Tacconelli S, Perrone MG, Malerba P, Simone L, Scilimati A, Lavecchia A, Dovizio M, Marcantoni E, Bruno A, Patrignani P. Synthesis, pharmacological characterization, and docking analysis of a novel family of diarylisoxazoles as highly selective cyclooxygenase-1 (COX-1) inhibitors. *J Med Chem*. 2013;56(11):4277-99. Epub 2013/05/09. doi: 10.1021/jm301905a. PubMed PMID: 23651359.
21. Liu B, Zhang Y, Zhu N, Li H, Luo W, Zhou Y. A vasoconstrictor role for cyclooxygenase-1-mediated prostacyclin synthesis in mouse renal arteries. *Am J Physiol Renal Physiol*. 2013;305(9):F1315-22. Epub 2013/08/30. doi: 10.1152/ajprenal.00332.2013. PubMed PMID: 23986518.
22. Hoozemans JJ, Rozemuller AJ, Janssen I, De Groot CJ, Veerhuis R, Eikelenboom P. Cyclooxygenase expression in microglia and neurons in Alzheimer's

- disease and control brain. *Acta Neuropathol.* 2001;101(1):2-8. Epub 2001/02/24. PubMed PMID: 11194936.
23. Yermakova AV, Rollins J, Callahan LM, Rogers J, O'Banion MK. Cyclooxygenase-1 in human Alzheimer and control brain: quantitative analysis of expression by microglia and CA3 hippocampal neurons. *J Neuropathol Exp Neurol.* 1999;58(11):1135-46. Epub 1999/11/24. PubMed PMID: 10560656.
24. Coma M, Sereno L, Da Rocha-Souto B, Scotton TC, Espana J, Sanchez MB, Rodriguez M, Agullo J, Guardia-Laguarta C, Garcia-Alloza M, Borrelli LA, Clarimon J, Lleo A, Bacskai BJ, Saura CA, Hyman BT, Gomez-Isla T. Triflusal reduces dense-core plaque load, associated axonal alterations and inflammatory changes, and rescues cognition in a transgenic mouse model of Alzheimer's disease. *Neurobiol Dis.* 2010;38(3):482-91. Epub 2010/02/13. doi: 10.1016/j.nbd.2010.01.019. PubMed PMID: 20149872; PMCID: PMC3707138.
25. Choi SH, Bosetti F. Cyclooxygenase-1 null mice show reduced neuroinflammation in response to beta-amyloid. *Aging (Albany NY).* 2009;1(2):234-44. Epub 2010/02/17. doi: 10.18632/aging.100021. PubMed PMID: 20157512; PMCID: PMC2806008.
26. Sagy-Bross C, Hadad N, Levy R. Cytosolic phospholipase A2alpha upregulation mediates apoptotic neuronal death induced by aggregated amyloid-beta peptide1-42. *Neurochem Int.* 2013;63(6):541-50. Epub 2013/09/21. doi: 10.1016/j.neuint.2013.09.007. PubMed PMID: 24044897.
27. Desbene C, Malaplate-Armand C, Youssef I, Garcia P, Stenger C, Sauvee M, Fischer N, Rimet D, Koziel V, Escanye MC, Oster T, Kriem B, Yen FT, Pillot T, Olivier JL. Critical role of cPLA2 in Abeta oligomer-induced neurodegeneration and memory deficit. *Neurobiol Aging.* 2012;33(6):1123 e17-29. Epub 2011/12/23. doi: 10.1016/j.neurobiolaging.2011.11.008. PubMed PMID: 22188721.
28. Shi J, Wang Q, Johansson JU, Liang X, Woodling NS, Priyam P, Loui TM, Merchant M, Breyer RM, Montine TJ, Andreasson K. Inflammatory prostaglandin E2 signaling in a mouse model of Alzheimer disease. *Ann Neurol.* 2012;72(5):788-98. Epub 2012/08/24. doi: 10.1002/ana.23677. PubMed PMID: 22915243; PMCID: PMC3509238.
29. Kitamura Y, Shimohama S, Koike H, Kakimura J, Matsuoka Y, Nomura Y, Gebicke-Haerter PJ, Taniguchi T. Increased expression of cyclooxygenases and peroxisome proliferator-activated receptor-gamma in Alzheimer's disease brains. *Biochem Biophys Res Commun.* 1999;254(3):582-6. Epub 1999/01/28. PubMed PMID: 9920782.
30. Hoozemans JJ, Rozemuller JM, van Haastert ES, Veerhuis R, Eikelenboom P. Cyclooxygenase-1 and -2 in the different stages of Alzheimer's disease pathology. *Curr Pharm Des.* 2008;14(14):1419-27. Epub 2008/06/10. PubMed PMID: 18537664.
31. van Gool WA, Aisen PS, Eikelenboom P. Anti-inflammatory therapy in Alzheimer's disease: is hope still alive? *J Neurol.* 2003;250(7):788-92. Epub 2003/07/29. doi: 10.1007/s00415-003-1146-5. PubMed PMID: 12883918.
32. McGeer PL. Cyclo-oxygenase-2 inhibitors: rationale and therapeutic potential for Alzheimer's disease. *Drugs Aging.* 2000;17(1):1-11. Epub 2000/08/10. PubMed PMID: 10933512.
33. Hoshino T, Namba T, Takehara M, Nakaya T, Sugimoto Y, Araki W, Narumiya S, Suzuki T, Mizushima T. Prostaglandin E2 stimulates the production of amyloid-beta peptides through internalization of the EP4 receptor. *J Biol Chem.* 2009;284(27):18493-502. Epub 2009/05/02. doi: 10.1074/jbc.M109.003269. PubMed PMID: 19407341; PMCID: PMC2709369.
34. Liang X, Wang Q, Hand T, Wu L, Breyer RM, Montine TJ, Andreasson K. Deletion of the prostaglandin E2 EP2 receptor reduces oxidative damage and amyloid burden in a model of Alzheimer's disease. *J Neurosci.* 2005;25(44):10180-7. Epub 2005/11/04. doi:

- 10.1523/JNEUROSCI.3591-05.2005. PubMed PMID: 16267225.
35. Keene CD, Chang RC, Lopez-Yglesias AH, Shalloway BR, Sokal I, Li X, Reed PJ, Keene LM, Montine KS, Breyer RM, Rockhill JK, Montine TJ. Suppressed accumulation of cerebral amyloid {beta} peptides in aged transgenic Alzheimer's disease mice by transplantation with wild-type or prostaglandin E2 receptor subtype 2-null bone marrow. *Am J Pathol.* 2010;177(1):346-54. Epub 2010/06/05. doi: 10.2353/ajpath.2010.090840. PubMed PMID: 20522650; PMCID: PMC2893677.
36. Zhen G, Kim YT, Li RC, Yocum J, Kapoor N, Langer J, Dobrowolski P, Maruyama T, Narumiya S, Dore S. PGE2 EP1 receptor exacerbated neurotoxicity in a mouse model of cerebral ischemia and Alzheimer's disease. *Neurobiol Aging.* 2012;33(9):2215-9. Epub 2011/10/22. doi: 10.1016/j.neurobiolaging.2011.09.017. PubMed PMID: 22015313; PMCID: PMC3299840.
37. Cheng Y, Austin SC, Rocca B, Koller BH, Coffman TM, Grosser T, Lawson JA, FitzGerald GA. Role of prostacyclin in the cardiovascular response to thromboxane A2. *Science.* 2002;296(5567):539-41. doi: 10.1126/science.1068711. PubMed PMID: 11964481.
38. Oida H, Namba T, Sugimoto Y, Ushikubi F, Ohishi H, Ichikawa A, Narumiya S. In situ hybridization studies of prostacyclin receptor mRNA expression in various mouse organs. *British journal of pharmacology.* 1995;116(7):2828-37. PubMed PMID: 8680713; PMCID: 1909220.
39. Siegle I, Klein T, Zou MH, Fritz P, Komhoff M. Distribution and cellular localization of prostacyclin synthase in human brain. *J Histochem Cytochem.* 2000;48(5):631-41. Epub 2000/04/18. doi: 10.1177/002215540004800507. PubMed PMID: 10769047.
40. Fang YC, Wu JS, Chen JJ, Cheung WM, Tseng PH, Tam KB, Shyue SK, Chen JJ, Lin TN. Induction of prostacyclin/PGI2 synthase expression after cerebral ischemia-reperfusion. *Journal of cerebral blood flow and metabolism :* official journal of the International Society of Cerebral Blood Flow and Metabolism. 2006;26(4):491-501. doi: 10.1038/sj.jcbfm.9600205. PubMed PMID: 16094316.
41. Dogan A, Temiz C, Turker RK, Egemen N, Baskaya MK. Effect of the prostacyclin analogue, iloprost, on infarct size after permanent focal cerebral ischemia. *General pharmacology.* 1996;27(7):1163-6. PubMed PMID: 8981062.
42. Matsuda S, Wen TC, Karasawa Y, Araki H, Otsuka H, Ishihara K, Sakanaka M. Protective effect of a prostaglandin I2 analog, TEI-7165, on ischemic neuronal damage in gerbils. *Brain research.* 1997;769(2):321-8. PubMed PMID: 9374201.
43. Ruan KH, Deng H, So SP. Engineering of a protein with cyclooxygenase and prostacyclin synthase activities that converts arachidonic acid to prostacyclin. *Biochemistry.* 2006;45(47):14003-11. Epub 2006/11/23. doi: 10.1021/bi0614277. PubMed PMID: 17115695.
44. Ruan KH, Wu J, Cervantes V. Characterization of the substrate mimic bound to engineered prostacyclin synthase in solution using high-resolution NMR spectroscopy and mutagenesis: implication of the molecular mechanism in biosynthesis of prostacyclin. *Biochemistry.* 2008;47(2):680-8. doi: 10.1021/bi701671q. PubMed PMID: 18081314.
45. Ling QL, Mohite AJ, Murdoch E, Akasaka H, Li QY, So SP, Ruan KH. Creating a mouse model resistant to induced ischemic stroke and cardiovascular damage. *Sci Rep.* 2018;8(1):1653. Epub 2018/01/28. doi: 10.1038/s41598-018-19661-y. PubMed PMID: 29374184; PMCID: PMC5786049.
46. Vollert C, Ohia O, Akasaka H, Berridge C, Ruan KH, Eriksen JL. Elevated prostacyclin biosynthesis in mice impacts memory and anxiety-like behavior. *Behav Brain Res.* 2014;258:138-44. Epub 2013/10/22. doi: 10.1016/j.bbr.2013.10.012. PubMed PMID: 24140503; PMCID: PMC3849419.
47. Smith CC, Stanyer L, Betteridge DJ. Soluble beta-amyloid (A beta) 40 causes attenuation or



- potentiation of noradrenaline-induced vasoconstriction in rats depending upon the concentration employed. *Neuroscience letters*. 2004;367(1):129-32. doi: 10.1016/j.neulet.2004.05.094. PubMed PMID: 15308313.
48. Bush AI, Martins RN, Rumble B, Moir R, Fuller S, Milward E, Currie J, Ames D, Weidemann A, Fischer P, et al. The amyloid precursor protein of Alzheimer's disease is released by human platelets. *The Journal of biological chemistry*. 1990;265(26):15977-83. PubMed PMID: 2118534.
49. He T, Santhanam AV, Lu T, d'Uscio LV, Katusic ZS. Role of prostacyclin signaling in endothelial production of soluble amyloid precursor protein- $\alpha$  in cerebral microvessels. *Journal of cerebral blood flow and metabolism : official journal of the International Society of Cerebral Blood Flow and Metabolism*. 2017;37(1):106-22. doi: 10.1177/0271678X15618977. PubMed PMID: 26661245; PMCID: 5363732.
50. Wang P, Guan PP, Guo JW, Cao LL, Xu GB, Yu X, Wang Y, Wang ZY. Prostaglandin I<sub>2</sub> upregulates the expression of anterior pharynx-defective-1 $\alpha$  and anterior pharynx-defective-1 $\beta$  in amyloid precursor protein/presenilin 1 transgenic mice. *Aging Cell*. 2016;15(5):861-71. Epub 2016/06/01. doi: 10.1111/ace.12495. PubMed PMID: 27240539; PMCID: PMC5013024.
51. Lalonde R, Kim HD, Maxwell JA, Fukuchi K. Exploratory activity and spatial learning in 12-month-old APP(695)SWE/co+PS1/DeltaE9 mice with amyloid plaques. *Neuroscience letters*. 2005;390(2):87-92. doi: 10.1016/j.neulet.2005.08.028. PubMed PMID: 16169151.
52. Holcomb L, Gordon MN, McGowan E, Yu X, Benkovic S, Jantzen P, Wright K, Saad I, Mueller R, Morgan D, Sanders S, Zehr C, O'Campo K, Hardy J, Prada CM, Eckman C, Younkin S, Hsiao K, Duff K. Accelerated Alzheimer-type phenotype in transgenic mice carrying both mutant amyloid precursor protein and presenilin 1 transgenes. *Nature medicine*. 1998;4(1):97-100. PubMed PMID: 9427614.
53. Holcomb LA, Gordon MN, Jantzen P, Hsiao K, Duff K, Morgan D. Behavioral changes in transgenic mice expressing both amyloid precursor protein and presenilin-1 mutations: lack of association with amyloid deposits. *Behav Genet*. 1999;29(3):177-85. PubMed PMID: 10547924.
54. Elhardt M, Martinez L, Tejada-Simon MV. Neurochemical, behavioral and architectural changes after chronic inactivation of NMDA receptors in mice. *Neurosci Lett*. 2010;468(2):166-71. Epub 2009/11/10. doi: 10.1016/j.neulet.2009.10.091. PubMed PMID: 19895868; PMCID: PMC2787724.
55. Martinez LA, Klann E, Tejada-Simon MV. Translocation and activation of Rac in the hippocampus during associative contextual fear learning. *Neurobiol Learn Mem*. 2007;88(1):104-13. Epub 2007/03/17. doi: 10.1016/j.nlm.2007.01.008. PubMed PMID: 17363298.
56. Franklin KBJ, Paxinos G. The mouse brain in stereotaxic coordinates. Compact 3rd ed. / Keith B.J. Franklin, George Paxinos. ed. Amsterdam ; London: Elsevier Academic Press; 2008.
57. Tosi S, Tischer C. TubeAnalyst. 2014.
58. Dunn KW, Kamocka MM, McDonald JH. A practical guide to evaluating colocalization in biological microscopy. *American journal of physiology Cell physiology*. 2011;300(4):C723-42. doi: 10.1152/ajpcell.00462.2010. PubMed PMID: 21209361; PMCID: 3074624.
59. Yang C, DeMars KM, Alexander JC, Febo M, Candelario-Jalil E. Sustained Neurological Recovery After Stroke in Aged Rats Treated With a Novel Prostacyclin Analog. *Stroke*. 2017;48(7):1948-56. doi: 10.1161/STROKEAHA.117.016474. PubMed PMID: 28588054; PMCID: 5508605.
60. Muramatsu R, Kuroda M, Matoba K, Lin H, Takahashi C, Koyama Y, Yamashita T. Prostacyclin prevents pericyte loss and demyelination induced by lysophosphatidylcholine in the central nervous system. *J Biol Chem*.

- 2015;290(18):11515-25. Epub 2015/03/22. doi: 10.1074/jbc.M114.587253. PubMed PMID: 25795781; PMCID: PMC4416855.
61. Keil MF, Briassoulis G, Stratakis CA. The Role of Protein Kinase A in Anxiety Behaviors. *Neuroendocrinology*. 2016;103(6):625-39. doi: 10.1159/000444880. PubMed PMID: 26939049.
62. Wei G, Kibler KK, Koehler RC, Maruyama T, Narumiya S, Dore S. Prostacyclin receptor deletion aggravates hippocampal neuronal loss after bilateral common carotid artery occlusion in mouse. *Neuroscience*. 2008;156(4):1111-7. doi: 10.1016/j.neuroscience.2008.07.073. PubMed PMID: 18790018.
63. Snyder HM, Corriveau RA, Craft S, Faber JE, Greenberg SM, Knopman D, Lamb BT, Montine TJ, Nedergaard M, Schaffer CB, Schneider JA, Wellington C, Wilcock DM, Zipfel GJ, Zlokovic B, Bain LJ, Bosetti F, Galis ZS, Koroshetz W, Carrillo MC. Vascular contributions to cognitive impairment and dementia including Alzheimer's disease. *Alzheimers Dement*. 2015;11(6):710-7. Epub 2014/12/17. doi: 10.1016/j.jalz.2014.10.008. PubMed PMID: 25510382; PMCID: PMC4731036.
64. Bell RD, Zlokovic BV. Neurovascular mechanisms and blood-brain barrier disorder in Alzheimer's disease. *Acta Neuropathol*. 2009;118(1):103-13. Epub 2009/03/26. doi: 10.1007/s00401-009-0522-3. PubMed PMID: 19319544; PMCID: PMC2853006.
65. Zlokovic BV. Neurovascular pathways to neurodegeneration in Alzheimer's disease and other disorders. *Nat Rev Neurosci*. 2011;12(12):723-38. Epub 2011/11/04. doi: 10.1038/nrn3114. PubMed PMID: 22048062; PMCID: PMC4036520.
66. Jin WS, Bu XL, Wang YR, Li L, Li WW, Liu YH, Zhu C, Yao XQ, Chen Y, Gao CY, Zhang T, Zhou HD, Zeng F, Wang YJ. Reduced Cardiovascular Functions in Patients with Alzheimer's Disease. *Journal of Alzheimer's disease : JAD*. 2017;58(3):919-25. doi: 10.3233/JAD-170088. PubMed PMID: 28505975.
67. Roher AE, Debbins JP, Malek-Ahmadi M, Chen K, Pipe JG, Maze S, Belden C, Maarouf CL, Thiyyagura P, Mo H, Hunter JM, Kokjohn TA, Walker DG, Kruchowsky JC, Belohlavek M, Sabbagh MN, Beach TG. Cerebral blood flow in Alzheimer's disease. Vascular health and risk management. 2012;8:599-611. doi: 10.2147/VHRM.S34874. PubMed PMID: 23109807; PMCID: 3481957.
68. Ezzati A, Wang C, Lipton RB, Altschul D, Katz MJ, Dickson DW, Derby CA. Association Between Vascular Pathology and Rate of Cognitive Decline Independent of Alzheimer's Disease Pathology. *Journal of the American Geriatrics Society*. 2017;65(8):1836-41. doi: 10.1111/jgs.14903. PubMed PMID: 28407205; PMCID: 5555777.
69. Kelleher RJ, Soiza RL. Evidence of endothelial dysfunction in the development of Alzheimer's disease: Is Alzheimer's a vascular disorder? *American journal of cardiovascular disease*. 2013;3(4):197-226. PubMed PMID: 24224133; PMCID: 3819581.
70. Lai AY, Dorr A, Thomason LA, Koletar MM, Sled JG, Stefanovic B, McLaurin J. Venular degeneration leads to vascular dysfunction in a transgenic model of Alzheimer's disease. *Brain : a journal of neurology*. 2015;138(Pt 4):1046-58. doi: 10.1093/brain/awv023. PubMed PMID: 25688079.
71. Sengillo JD, Winkler EA, Walker CT, Sullivan JS, Johnson M, Zlokovic BV. Deficiency in mural vascular cells coincides with blood-brain barrier disruption in Alzheimer's disease. *Brain Pathol*. 2013;23(3):303-10. Epub 2012/11/07. doi: 10.1111/bpa.12004. PubMed PMID: 23126372; PMCID: PMC3628957.
72. Bell RD. The imbalance of vascular molecules in Alzheimer's disease. *Journal of Alzheimer's disease : JAD*. 2012;32(3):699-709. doi: 10.3233/JAD-2012-121060. PubMed PMID: 22850315.
73. Thal DR, Griffin WS, de Vos RA, Ghebremedhin E. Cerebral amyloid angiopathy and its relationship to Alzheimer's disease. *Acta*

- neuropathologica. 2008;115(6):599-609. doi: 10.1007/s00401-008-0366-2. PubMed PMID: 18369648.
74. Biron KE, Dickstein DL, Gopaul R, Fenninger F, Jefferies WA. Cessation of neoangiogenesis in Alzheimer's disease follows amyloid-beta immunization. *Scientific reports*. 2013;3:1354. doi: 10.1038/srep01354. PubMed PMID: 23446889; PMCID: 3584312.
75. Desai BS, Schneider JA, Li JL, Carvey PM, Hendey B. Evidence of angiogenic vessels in Alzheimer's disease. *Journal of neural transmission*. 2009;116(5):587-97. doi: 10.1007/s00702-009-0226-9. PubMed PMID: 19370387; PMCID: 2753398.
76. Hunter JM, Kwan J, Malek-Ahmadi M, Maarouf CL, Kokjohn TA, Belden C, Sabbagh MN, Beach TG, Roher AE. Morphological and pathological evolution of the brain microcirculation in aging and Alzheimer's disease. *PloS one*. 2012;7(5):e36893. doi: 10.1371/journal.pone.0036893. PubMed PMID: 22615835; PMCID: 3353981.
77. Hooijmans CR, Graven C, Dederen PJ, Tanila H, van Groen T, Kiliaan AJ. Amyloid beta deposition is related to decreased glucose transporter-1 levels and hippocampal atrophy in brains of aged APP/PS1 mice. *Brain research*. 2007;1181:93-103. doi: 10.1016/j.brainres.2007.08.063. PubMed PMID: 17916337.
78. Burke MJ, Nelson L, Slade JY, Oakley AE, Khundakar AA, Kalaria RN. Morphometry of the hippocampal microvasculature in post-stroke and age-related dementias. *Neuropathol Appl Neurobiol*. 2014;40(3):284-95. Epub 2013/09/06. doi: 10.1111/nan.12085. PubMed PMID: 24003901; PMCID: PMC4282329.
79. Bell RD, Winkler EA, Sagare AP, Singh I, LaRue B, Deane R, Zlokovic BV. Pericytes control key neurovascular functions and neuronal phenotype in the adult brain and during brain aging. *Neuron*. 2010;68(3):409-27. Epub 2010/11/03. doi: 10.1016/j.neuron.2010.09.043. PubMed PMID: 21040844; PMCID: PMC3056408.
80. Sagare AP, Bell RD, Zhao Z, Ma Q, Winkler EA, Ramanathan A, Zlokovic BV. Pericyte loss influences Alzheimer-like neurodegeneration in mice. *Nat Commun*. 2013;4:2932. Epub 2013/12/18. doi: 10.1038/ncomms3932. PubMed PMID: 24336108; PMCID: PMC3945879.
81. Cudaback E, Jorstad NL, Yang Y, Montine TJ, Keene CD. Therapeutic implications of the prostaglandin pathway in Alzheimer's disease. *Biochem Pharmacol*. 2014;88(4):565-72. Epub 2014/01/18. doi: 10.1016/j.bcp.2013.12.014. PubMed PMID: 24434190; PMCID: PMC3972296.
